# Supplementary material for: Portable multi-ionic reverse electrodialysis for continuous power supply and controllable drug release
Source: Royal Society of Chemistry journal article supplement (doi:10.1039/d4lc01012d), 2025-01-01
Supplement: d4lc01012d1.pdf [file d4lc01012d1.pdf]

## Supplementary Information

Portable Multi-Ionic Reverse Electrodialysis for Continuous Power Supply  
and Controllable Drug Release

Hyewon Cho <sup>a</sup>, Jungjae Woo<sup>a</sup>, Haneul Jeon<sup>a</sup>, Hyejeong Kim<sup>a,b†</sup> and Chang-Soo Han<sup>a,c\*</sup>

<sup>a</sup>School of Mechanical Engineering, Korea University, 145 Anam-ro, Seongbuk-gu, Seoul,  
02841, South Korea

<sup>b</sup>Max Planck Institute for Dynamics and Self-Organization, Am Faßberg 17, 37077  
Göttingen, Germany

<sup>c</sup>Institute of Advanced Machinery Design Technology, Korea University, 145 Anam-ro,  
Seongbuk-gu, Seoul, 02841, South Korea

**a**

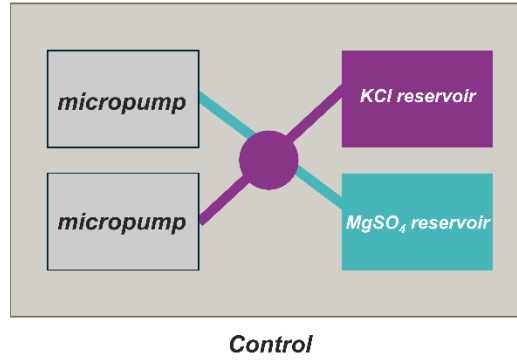

**b**

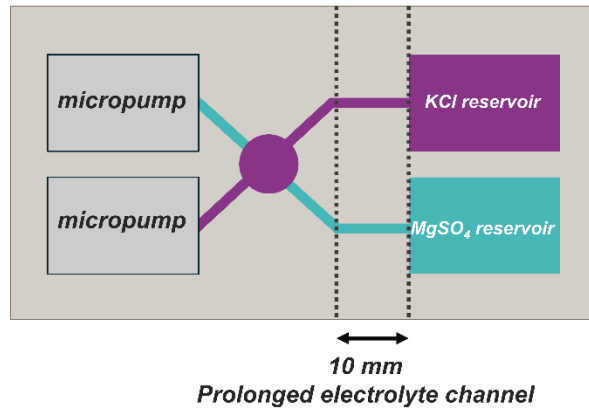

**Figure S1** | Schematic of the comparison of (a) basic device with (b) prolonged electrolyte engineered device.

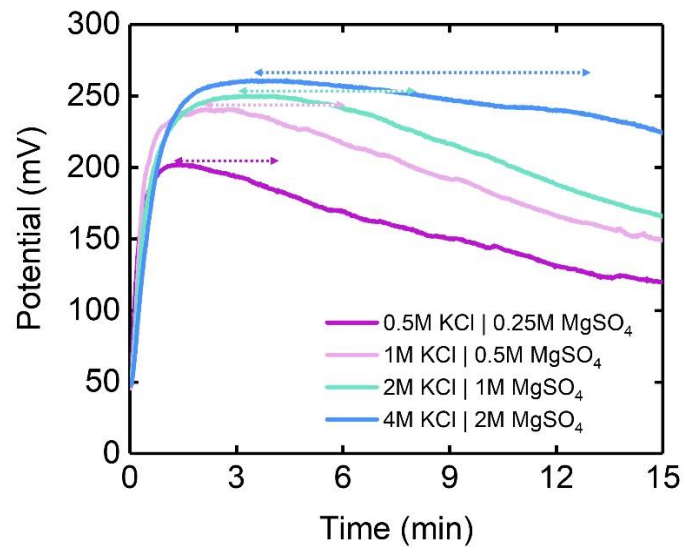

**Figure S2** | Time dependent potential measurement for various electrolyte concentration.

The arrow indicates each duration of performance maintenance over 90 % of maximum potential.

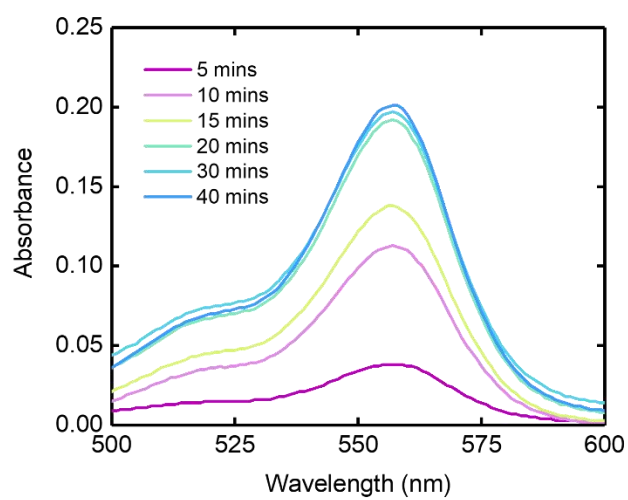

**Figure S3** | The corresponding absorbance when the MRED with cotton resistors of 28 mg were equipped.
